# SPADIS: An Algorithm for Selecting Predictive and Diverse SNPs in GWAS

Serhan Yilmaz\*, Oznur Tastan<sup>†</sup> and A. Ercument Cicek\*<sup>‡</sup>

\*Computer Engineering Department, Bilkent University, Ankara, 06800, Turkey

<sup>†</sup>Faculty of Engineering and Natural Sciences, Sabanci University, Istanbul, 34956, Turkey

<sup>‡</sup>Computational Biology Department, School of Computer Science, Carnegie Mellon University, Pittsburgh, PA, 15213, USA

Correspondence: <sup>†</sup>otastan@sabanciuniv.edu, <sup>‡</sup>cicek@cs.bilkent.edu.tr

**Abstract**—Phenotypic heritability of complex traits and diseases is seldom explained by individual genetic variants. Algorithms that select SNPs which are *close* and *connected* on a biological network have been successful in finding biologically-interpretable and predictive loci. However, we argue that the connectedness constraint favors selecting redundant features that affect similar biological processes and therefore does not necessarily yield better predictive performance. In this paper, we propose a novel method called SPADIS that selects SNPs that *cover* diverse regions in the underlying SNP-SNP network. SPADIS favors the selection of remotely located SNPs in order to account for the complementary additive effects of SNPs that are associated with the phenotype. This is achieved by maximizing a submodular set function with a greedy algorithm that ensures a constant factor  $(1 - 1/e)$  approximation. We compare SPADIS to the state-of-the-art method SConES, on a dataset of *Arabidopsis thaliana* genotype and continuous flowering time phenotypes. SPADIS has better regression performance in 12 out of 17 phenotypes on average, it identifies more candidate genes and runs faster. We also investigate the use of Hi-C data to construct SNP-SNP network in the context of SNP selection problem for the first time, which yields slight but consistent improvements in regression performance. SPADIS is available at <http://ciceklab.cs.bilkent.edu.tr/spadis>

**Index Terms**—Phenotype Prediction, GWAS, SNP Selection, SNP-SNP Networks, Hi-C, Submodular Function.

## I. INTRODUCTION

Genome-Wide Association Studies (GWAS) have led to a wide range of discoveries over the last decade where individual variations in DNA sequences, usually single nucleotide polymorphisms (SNPs), have been associated with phenotypic differences (Visscher *et al.*, 2017). However, individual variants often fail to explain the heritability of complex traits and diseases (Manolio *et al.*, 2009; Goldstein *et al.*, 2009) as a large number of variants contribute to these phenotypes and each variant has a small overall effect (Kraft and Hunter, 2009; Christensen and Murray, 2007). Thus, research efforts have focused on evaluating and associating multiple loci with a given phenotype (Moore *et al.*, 2010; Cordell, 2009). Indeed, detecting genetic interactions (epistasis) among pairs of loci has proven to be a powerful approach as discussed in several reviews (Phillips, 2008; Cordell, 2009; Wang *et al.*, 2010a;

Wei *et al.*, 2014).

Detecting higher-order combinations of genetic variations is computationally challenging. For this reason, exhaustive search approaches have been limited to small SNP counts (up to few hundreds) (Nelson *et al.*, 2001; Ritchie *et al.*, 2001; Lou *et al.*, 2007; Lehár *et al.*, 2008; Hua *et al.*, 2010; Fang *et al.*, 2012) and greedy search algorithms have been limited to searching for small combinations of SNPs – mostly around 3 (Storey *et al.*, 2005; Evans *et al.*, 2006; Yosef *et al.*, 2007; Varadan and Anastassiou, 2006; Varadan *et al.*, 2006; Zhang and Liu, 2007; Herold *et al.*, 2009; Tang *et al.*, 2009; Jiang *et al.*, 2009; Zhang *et al.*, 2010; Wang *et al.*, 2010b; Wan *et al.*, 2010; Guo *et al.*, 2014; Ding *et al.*, 2015; Ayati and Koyutürk, 2016; Tuo *et al.*, 2017). Multivariate regression-based approaches have been used (Shi *et al.*, 2008; Wu *et al.*, 2009; Cho *et al.*, 2010; Wang *et al.*, 2011a; Rakitsch *et al.*, 2012). However, (i) their predictive power is limited, (ii) incorporation of biological information in the models is not straightforward, and finally (iii) selected SNP set is often not biologically interpretable (Azencott *et al.*, 2013).

Assessing the significance of loci by grouping them based on functionally related genes, such as pathways, reduces the search space for testing associations and leads to discovery of more interpretable sets (Wang *et al.*, 2011b; de Leeuw *et al.*, 2015). Unfortunately, using gene sets and exonic regions for association restricts the search space to coding and nearby-coding regions. However, most of the genetic variation fall into non-coding genome (Hindorf *et al.*, 2009) and our knowledge of pathways are incomplete.

An alternative strategy to avoid literature bias is to select features on the SNP-SNP networks by applying regression based methods with sparsity and connectivity constraints (Jacob *et al.*, 2009; Huang *et al.*, 2011). These regularized methods jointly consider all predictors in the model as opposed to univariate test of associations. Nevertheless, using a SNP-SNP interaction network with these regression based

methods on GWAS yields intractable number of interactions. An efficient method called SConES uses a minimum graph cut-based approach to select predictive SNPs over a network of hundreds of thousands of SNPs (Azencott *et al.*, 2013; Sugiyama *et al.*, 2014). In their network, edges denote either (i) spatial proximity on the genomic sequence or (ii) functional proximity as encoded with PPI closeness of loci. The method selects a connected set of SNPs that are individually related to the phenotype under additive effect model and has been shown to perform better than graph-regularized regression-based methods.

We argue that enforcing the selected features to be in close proximity encourages the algorithm to pick features that are in linkage disequilibrium or that have similar functional consequences. One extreme choice of this approach would be to choose all SNPs that fall into the same gene if they are individually found to be significantly associated with the phenotype. This leads to selecting functionally redundant SNPs and variants that hit diverse processes may not be recovered when there is an upper limit on the number of SNPs to be selected. Genetic complementation on the other hand, is a well-known phenomenon where multiple loci in multiple genes need to be mutated in order to observe the phenotype (Fincham, 1968). While there are numerous examples of long-range (trans) genetic interactions for transcription control (Miele and Dekker, 2008) and long-range epistasis is evident in complex genetic diseases such as type 2 diabetes (Wiltshire *et al.*, 2006), such complementary effects may not be treated with this approach. For disorders with complex phenotypes like Autism Spectrum Disorder (ASD), this would be even more problematic since multiple functionalities (thus gene modules in the network) are required to be disrupted for an ASD diagnosis, whereas damage in only one leads to a more restricted phenotype (Geschwind, 2008).

We hypothesize that diversifying the SNPs in terms of location would result in *covering* complementary modules in the underlying network that cause the phenotype. Based on this rationale, here, we present SPADIS, a novel SNP selection algorithm over a SNP-SNP interaction network that favors (i) loci with high univariate associations to the phenotype and (ii) that are diverse in the sense that they are far apart on a loci interaction network. In order to incorporate these principles, we design a submodular set scoring function. To maximize this set function, we use a greedy algorithm that is guaranteed to return a solution which is a constant factor  $(1 - 1/e)$  approximate to the optimal solution. We compare our algorithm to the state-of-the-art, on a GWAS of *Arabidopsis Thaliana* (AT) with 17 continuous phenotypes related to flowering time (Atwell *et al.*, 2010). Replicating the experimental setting of Azencott *et al.* 2013 on the same dataset, we show that SPADIS has better regression performances on average in 12 out of 17 phenotypes with better runtime performance. We show that our method doubles the number of candidate genes identified and hits 23% more Gene Ontology (GO) terms indicating that selection of SPADIS is more diverse.

Finally, we also employ Hi-C data in the context of SNP se-

lection problem for the first time. Emerging evidence suggests that the spatial organization of the genome plays an important role in gene regulation Bickmore (2013) and contacts in 3D have been shown to affect the phenotype (Martin *et al.*, 2015; Jäger *et al.*, 2015). Hi-C technology can detect the 3D conformation genome-wide and yield contact maps which show loci that reside nearby in 3D (van Berkum *et al.*, 2010). We construct a SNP-SNP network based on genomic contacts in 3D as captured by Hi-C and use this network to guide SNP selection. Our results show that use of Hi-C based network provides a slight overall increase in the prediction performance for all methods tested.

## II. MATERIALS AND METHODS

The problem is formalized as a feature selection problem over a network of SNPs. Let  $n$  be the number of SNPs. The problem is to find a SNP subset  $S$  with cardinality at most  $k \ll n$  that explains the phenotype, given a background biological network  $G(V, E)$ . In  $G$ , vertices represent SNPs and edges link loci which are related based on spatial or functional proximity as explained in sections below.  $G$  can be a directed or an undirected graph.

We utilize a two-step approach. In the first step, we assess the relation of each SNP to the phenotype individually using the Sequence Kernel Association Test (SKAT) (Wu *et al.*, 2011). In the second step, our goal is to maximize the total score of SNP set while ensuring the selected set consists of SNPs that are remotely located on the network. Under the additive effect model, we define the set function shown in Equation 1 to encode this intuition.

$$F(S) = \sum_{i \in S} \left( c_i + \beta \left( 1 - \sum_{j \in S} \frac{K(i, j)}{2k} \right) \right) \quad (1)$$

$$K(i, j) = \begin{cases} 1 - d(i, j)/D & d(i, j) \leq D, \quad i \neq j \\ 0 & \text{otherwise} \end{cases}$$

Here  $\mathbf{c}$  is the scoring vector such that  $c_i \in \mathbb{R}_{\geq 0}$  indicates the level of the  $i$ -th SNP's association with the phenotype.  $D \in \mathbb{R}_{>0}$  is a distance limit parameter and  $d(i, j)$  is the shortest path between vertices  $i, j \in V$ . Note that,  $d(i, j) = \infty$  if  $j$  is not reachable from  $i$ .  $K(i, j)$  is a function that penalizes vertices that are in *close* proximity. That is, the vertices  $i$  and  $j$  are considered *close* if and only if  $d(i, j) \leq D$ . The second parameter,  $\beta \in \mathbb{R}_{\geq 0}$  controls the penalty to be applied when two close vertices are jointly included in  $S$ . Note that,  $K(i, j) \in [0, 1], \forall i, j \in V$  and  $c_i$  is non-negative.

Our aim is to find a subset of SNPs  $S^*$  of size  $k$  that maximizes  $F$ :

$$S^* = \operatorname{argmax}_{S \subseteq V, |S| \leq k} F(S) \quad (2)$$

Subset selection problem with cardinality constraint is NP-hard. Thus, exhaustive search is infeasible when  $k$  or  $V$  is not small. Hence, heuristic algorithms are required. We make use of the fact that the function defined in Equation 1 is submodular. Although submodular optimization itself is

---

**Algorithm 1** Greedy Algorithm
 

---

**Input:** Set function  $F$ , ground set  $V$ , cardinality constraint  $k \leq |V|$ .

**Output:** Set  $S \subset V$  such that  $|S|=k$ .

```

1:  $S \leftarrow \emptyset$ 
2: while  $|S| < k$  do
3:    $S \leftarrow S \cup \operatorname{argmax}_{x \in V \setminus S} F(S \cup x)$ 
4: end while
  
```

---

NP-hard as well (Krause and Guestrin, 2005), the greedy algorithm given in **Algorithm 1**, proposed by Nemhauser *et al.* 1978, guarantees a  $(1 - \frac{1}{e})$ -factor approximation to the optimal solution under cardinality constraint for monotonically non-decreasing and non-negative submodular functions. The greedy algorithm starts with an empty set and at each step, adds an element that maximizes the set function. Note that, this is equivalent to adding elements with the largest marginal gain.

For each of the  $k$  iterations in the algorithm, where  $k$  is the size of  $S^*$ , a single source shortest path problem needs to be solved. Hence, the worst-case time complexity of the algorithm is  $O(k(V + E))$  assuming that all edge weights are positive. For undirected graphs,  $K(i, j) = K(j, i)$  and computations can be reduced by half even though the time complexity remains the same.

A submodular function is a set function for which the gain in the value of the function after adding a single item decreases as the set size grows (diminishing returns). Next, we prove that  $F$  is a submodular set function.

**Definition 1.**  $V$  is the ground set,  $F : 2^V \rightarrow \mathbb{R}$  and  $S \subseteq V$ . The marginal gain of adding one element to the set  $S$  is:  $G(S, x) = F(S \cup \{x\}) - F(S)$  where  $x \in V \setminus S$ .

By plugging the definition of  $F$  in Equation 1, we can rewrite  $G$ .

$$\begin{aligned}
 G(S, x) &= F(S \cup \{x\}) - F(S) \\
 &= \sum_{i \in S \cup \{x\}} c_i + \beta \sum_{i \in S \cup \{x\}} \left( 1 - \sum_{j \in S \cup \{x\}} \left( \frac{K(i, j)}{2k} \right) \right) \\
 &\quad - \left( \sum_{i \in S} c_i + \beta \sum_{i \in S} \left( 1 - \sum_{j \in S} \left( \frac{K(i, j)}{2k} \right) \right) \right) \\
 &= c_x + \beta - \frac{\beta}{2k} \sum_{i \in S} (K(i, x) + K(x, i))
 \end{aligned} \tag{3}$$

**Definition 2.** A function  $F$  that is defined on sets, is *submodular* if and only if  $G(A, x) \geq G(B, x)$  or equivalently  $F(A \cup \{x\}) - F(A) \geq F(B \cup \{x\}) - F(B)$  for all sets  $A, B$  where  $A \subset B \subset V$  and  $x \in V \setminus B$ .

**Lemma 1.**  $F(S)$  given in Equation 1 is *submodular*.

*Proof.*  $F$  is *submodular* if and only if the following is true:

$$G(A, x) - G(B, x) \geq 0 \tag{4}$$

Let  $H(A, B, x)$  be,

$$\begin{aligned}
 H(A, B, x) &= G(A, x) - G(B, x) \\
 &= \left( c_x + \beta - \frac{\beta}{2k} \left( \sum_{i \in A} (K(i, x) + K(x, i)) \right) \right) \\
 &\quad - \left( c_x + \beta - \frac{\beta}{2k} \left( \sum_{i \in B} (K(i, x) + K(x, i)) \right) \right) \\
 &= \frac{\beta}{2k} \left( \sum_{i \in B \setminus A} (K(i, x) + K(x, i)) \right)
 \end{aligned} \tag{5}$$

Since  $K(i, j) \geq 0 \forall i, j \in V$ ,  $H(A, B, x) \geq 0$ . Hence,  $F$  is *submodular*.  $\square$

To be able to use the greedy algorithm,  $F$  must be a monotonically non-decreasing and non-negative function. Below, we prove that  $F$  satisfies these properties.

**Definition 3.**  $F(S)$  is *monotonically non-decreasing* function for sets if and only if the corresponding gain function is always non-negative i.e.  $G(S, x) \geq 0$  for all sets  $S \subset V$  and  $x \in V$ .

**Lemma 2.**  $F(S)$  given in Equation 1 is *monotonically non-decreasing* for sets for which  $|S| \leq k$ .

*Proof.* Since  $K(i, j) \leq 1 \forall i, j$ ,  $G(S, x)$  is bounded such that;

$$\begin{aligned}
 G(S, x) &\geq c_x + \beta - \frac{\beta}{2k} \sum_{i \in S} (1 + 1) \\
 &\geq c_x + \beta - \frac{\beta}{2k} 2|S| \\
 &\geq c_x + \beta(1 - |S|/k) \\
 &\geq (1 - |S|/k) \\
 &\geq 0
 \end{aligned} \tag{6}$$

Since  $|S| \leq k$ ,  $F(S)$  is *monotonically non-decreasing*.  $\square$

**Lemma 3.**  $F(S)$  given in Equation 1 is non-negative for sets  $|S| \leq k$ .

*Proof.* For any set  $S = \{v_1, v_2, \dots, v_n\}$  with cardinality  $n$ , let  $S^i$  denote the subset of  $S$  that contains elements up to the  $i$ -th element, i.e.  $S^i = \{v_1, v_2, \dots, v_i\}$  and  $S^i = \emptyset$  for  $i = 0$ .  $F(S)$  can be decomposed as the summation of marginal gain functions:

$$F(S) = F(\emptyset) + \sum_{i=1}^n G(S^{i-1}, v_i) \tag{7}$$

$F(\emptyset) = 0$  by the definition of  $F(S)$ . **Lemma 2** states that  $G(S, x) \geq 0$  for all sets  $S \subset V$  and  $x \in V \setminus S$  when  $|S| \leq k$ . Hence,  $F(S) \geq 0$  for all sets  $S \subset V$  where  $|S| \leq k$ .  $\square$

### III. RESULTS

#### A. Dataset

We use *AT* genotype and phenotype data from Atwell *et al.* 2010. The dataset includes 17 phenotypes related to flowering times (up to  $m = 180$  samples and  $n = 214,051$  SNPs). Gene-gene interaction network is constructed based on TAIR protein-protein interaction data<sup>1</sup>. SNPs with a minor allele frequency (MAF)  $< 10\%$  are disregarded ( $n = 173,219$  SNPs remained) and population stratification is corrected using the principal components of the genotype data (Price *et al.*, 2006). Candidate genes pertaining to each phenotype is retrieved from Segura *et al.* (2012) and used for validating the models. Gene Ontology (GO) annotations are obtained from TAIR (Berardini *et al.*, 2004). We obtain the Hi-C data for *AT* from Wang *et al.* 2015 and process the intra-chromosomal contact matrices using the Fit-Hi-C method (Ay *et al.*, 2014).

#### B. Networks

We construct four undirected SNP-SNP networks. To be able to compare the performances of SPADIS and SConES in a controlled setting, we use three networks defined in Azencott *et al.* 2013: The *GS* network links loci that are adjacent on the DNA. The *GM* (*gene membership*) network additionally links two loci if both loci fall into the same gene or they are both close to the same gene below a threshold of 20,000 bp. The *GI* (*gene interaction*) network also links any two loci if their nearby genes are interacting in the protein interaction network. Note that,  $GS \subset GM \subset GI$ . To investigate the usefulness of the 3D conformation of the genome in this setting, we introduce a new network, *GS-HICN* which connects loci that are close in 3D in addition to 2D (*GS*). That is, an edge is added on top of the *GS* network for loci pairs that are significantly close in 3D (FDR adjusted p-value  $\leq 0.05$ ). All networks contain 173,219 vertices. The number of (undirected) edges are as follows: *GS*: 173,214, *GM*: 11,661,166, *GI*: 18,134,516, *GS-HICN*: 2,919,607.

#### C. Compared Methods

We compare SPADIS with the following methods using the networks described in *Networks* section:

*SConES*: It is a network-constrained SNP selection method that provides a max-flow based solution (Azencott *et al.*, 2013).

*Univariate*: We run a univariate linear regression and select SNPs that are found to be significantly associated with the phenotype (FDR-adjusted p-value  $\leq 0.05$ ) (Yekutieli and Benjamini, 1999). If more than  $k$  SNPs are found to be associated, the most significant  $k$  SNPs are picked.

<sup>1</sup><ftp://ftp.arabidopsis.org/home/tair/Proteins/>

*Lasso*: The Lasso regression (Tibshirani, 1996) that minimizes the prediction error with an the  $\ell_1$ -regularizer of the coefficient vectors. We use the SLEP implementation (Liu *et al.*, 2009).

*GraphLasso and GroupLasso*: We also compare our method to GraphLasso and GroupLasso (Jacob *et al.*, 2009) through simulations, using the implementation in the SLEP package. Due to the prohibitive runtimes of these algorithms, they are excluded from the comparison on *AT* dataset (see *Time Performance* section). For GraphLasso, SNP pairs connected with an edge constitute a separate group, i.e. one such group is constructed for every edge in the network. For GroupLasso, the groups are defined as follows. For *GS*: every consecutive SNP pair on the genome constitute a single group. This is equivalent to setting a group for an edge. For *GM*: the SNPs *near* ( $< 20$  kbp) of a gene are considered as a group, and a separate group is constructed for every gene. For *GI*: the SNPs that are *near* interacting genes in the PPI network are combined and formed a single group. The SNPs that are *near* genes but do not participate in the interaction network are assigned to groups based on their gene membership as in *GM*. For *GS-HICN*: SNP pairs connected with an edge is considered as a separate group similar to the groups in GraphLasso.

#### D. Experimental Setup Details

We consider the following experimental settings.

1) *Experimental Setting 1 (ES1)*: The first one is SConES' setting explained in (Azencott *et al.*, 2013). In a 10-fold cross validation setting, a parameter search is conducted for each fold separately. The parameters that maximize the desired objective (e.g., stability, regression performance) are selected. With the best parameter set, the SNPs are selected with the corresponding method (please see *Parameter Selection* section for details). Then, for evaluation, ridge regression is performed on the complete dataset using a 10-fold cross validation setting using this SNP set. Although this strategy is adopted due to the limited dataset size in Azencott *et al.* 2013, it also implicates that the test data is used during the feature selection step which might lead to memorization. We use this setting to check if we could replicate the values reported in (Azencott *et al.*, 2013). Using this setting, we show that we can successfully reproduce the reported precision of the selected SNPs and  $R^2$  values of SConES in Supplementary Figures 1 and 2, respectively.

2) *Experimental Setting 2 (ES2)*: We use nested cross-validation, the outer 10-fold cross-validation splits the data into training and test sets, and the inner loop is used to select the parameters via 10-fold cross-validation on the training set. In the inner loop at each fold, the scheme described in *ES1* is run on the training data. Note that, parameter selection is repeated 10 times in *ES2* and the test data is never seen by the algorithms. Unless otherwise stated, we use *ES2* in all experiments.

#### E. Parameter Selection

A fair comparison among such a diverse range of methods is challenging. SPADIS operates with a cardinality constraint, whereas other methods have parameters that affect the number

of selected SNPs. To account for these differences, we consider two parameter selection settings.

**Parameter Selection Setting 1 (PSS1).** We measure the predictive power of methods by constraining them to select a fixed number of SNPs ( $k$ ). We achieve this by applying binary search over a range of sparsity parameter values that yields close to  $k$  chosen SNPs.

**Parameter Selection Setting 2 (PSS2).** We allow the methods to select SNP sets of different sizes as long as the set size is smaller than an upper bound. In *AT* data, this upper bound is set as the 1% of the total number of SNPs which is 1733 (as also done in Azencott *et al.* 2013).

In each setting, we select parameters either based on stability denoted with (S) (via consistency index) or regression performance denoted with (R). For consistency index based parameter selection (S), the common set of SNPs consistently selected across all training folds are chosen. In regression based parameter selection (R), SNP set is selected by a single run with the best parameter set on the training data. For SPADIS, we use only the regression performance (R) as SPADIS performs better with this strategy, for other methods we experiment with both of them. More details on parameter selection for each method are given in Supplementary Text 3.1.

### F. Time Performance

We report the CPU runtime of all methods, across a range of number of SNPs (from 1000 to 173,219) and four networks. The measurements are taken on a single dedicated core of Intel i7-6700HQ processor. The runtime tests are conducted for one cross-validation fold with preset parameters on a single phenotype FT Field, which has the most number of samples available ( $m = 180$ ).

We consider a method to time-out if it takes more than  $10^3$  seconds for a single run because the runtime of the complete test (10 folds with parameter selection) would take more than 1 CPU week ( $10^3$  seconds  $\times$  10 evaluation folds  $\times$  10 training folds  $\times$  at least 7 parameters).

Results show that SPADIS is more efficient time-wise than all other methods except the Univariate method (Fig. 1). GroupLasso and GraphLasso do not scale to SNP selection problem in GWAS. Hence, they are not included in the performance experiments that are described in *Phenotype Prediction Performance* section.

### G. Simulated Experiments

To assess the performance of the methods in a controlled setting, we conduct simulated experiments. We randomly choose 200 samples (out of 1307) in *AT* data. We select 500 random SNPs with MAF  $> 10\%$  as follows: We first select 25 genes randomly. Then, we select 20 random SNPs near ( $< 20$  kbp) each gene. In each experiment, we designate 15 SNPs to be causal and generate phenotypes using the regression model:  $\mathbf{y} = \mathbf{X}\mathbf{w} + \epsilon$ , where  $\mathbf{y} \in \mathbb{R}^{m \times 1}$  is the phenotype vector,  $\mathbf{X} \in \mathbb{R}^{m \times n}$  is the genotype matrix,  $\mathbf{w} \in \mathbb{R}^{n \times 1}$  is the weight vector for each SNP, and  $\epsilon$  is the error term. Both

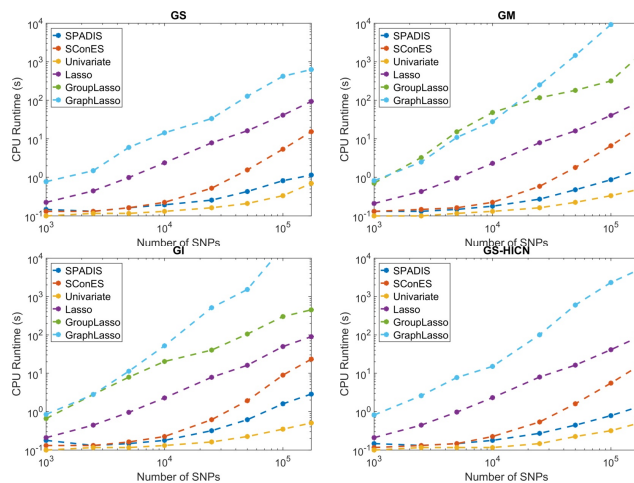

Fig. 1: CPU time measurements of SPADIS, SConES, Univariate, Lasso, GroupLasso and GraphLasso from 1,000 to 173,219 SNPs on four different networks. GS, GM, GI, GS-HICN respectively from left to right. Note that, runtimes of GroupLasso and GraphLasso are the same for GS and GS-HICN networks by construction.

$\mathbf{w}$  and  $\epsilon$  are normally distributed. We sample the weights of the causal SNPs from a standard normal distribution. We argue that in a real-life setting, there is no clear separation between causal and non-causal SNPs i.e. all SNPs play some part in explaining the phenotype at varying degrees. Hence, we sample the weights of the non-causal SNPs from a normal distribution with zero mean and 0.1 standard deviation instead of setting them directly to zero.

We compare the methods under four different simulation settings: (a) the causal SNPs are randomly selected, (b) the causal SNPs are selected randomly such that they are near different genes, (c) 5 causal genes are determined and 3 SNPs near each causal gene are selected for a total of 15 SNPs, and (d) the causal SNPs are selected near a single random gene.

For each method, we adopt the parameter selection strategy *PSS1* and experimental setting *ES2* and select the parameters such that the number of selected SNPs is  $k$ . We test with  $k = 5, 10$  and 15. For evaluation, we consider three metrics: (i) Precision as the ratio of the number of causal SNPs that are selected and the total number of SNPs selected, (ii) Number of causal genes hit (a gene is hit if a SNP near that gene is selected), (iii) Pearson's squared correlation coefficient ( $R^2$ ). We perform 10-fold cross-validation 50 times and report averages over all folds. The 95% confidence interval for the means of the specified statistics are calculated assuming a t-distribution on the error.

In all experimental settings except the fourth on the *GS* network, SPADIS outperforms other methods when  $k$  is less than the number of causal SNPs (Fig. 2). When the  $k$  is equal to the number of causal SNPs, Lasso catches up to SPADIS and they outperform all other methods. In the fourth setting where the assumptions of SPADIS are violated, SPADIS underperforms compared to others in term of Precision. However,

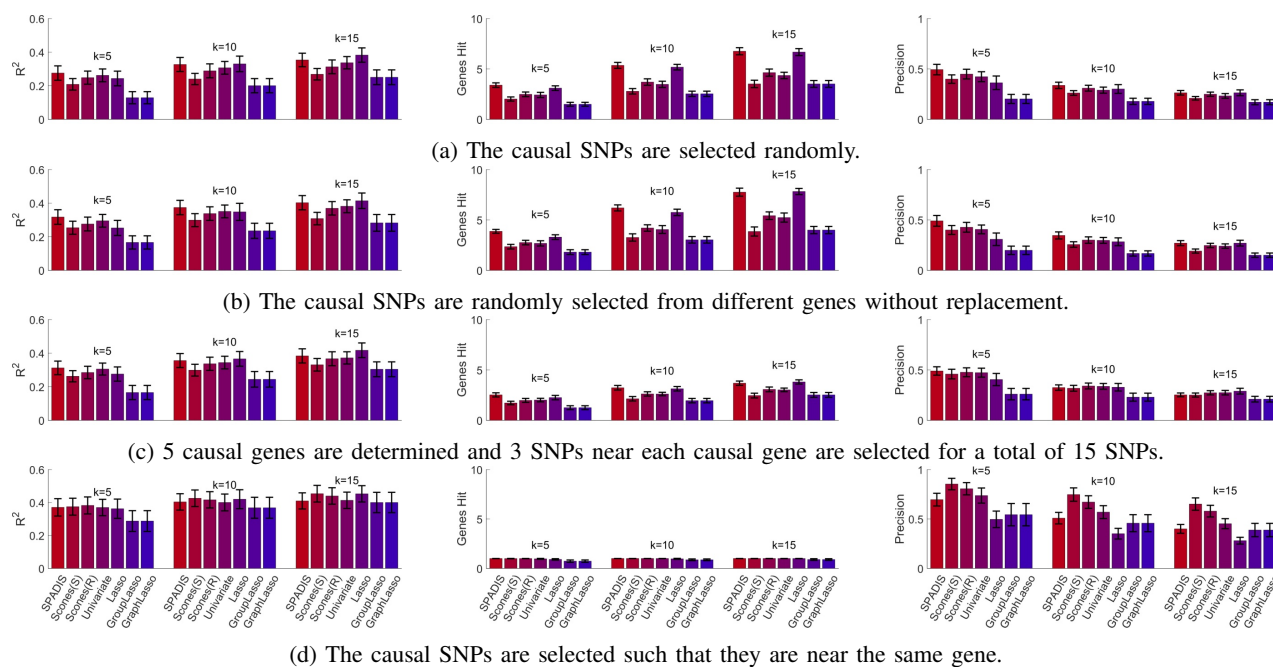

Fig. 2: The simulation results of SPADIS, SConES(R), SConES(S), Lasso, Univariate, GroupLasso and GraphLasso on GS network for  $k = 5$ ,  $k = 10$  and  $k = 15$ . (a) Causal SNPs are picked randomly. (b) All causal SNPs are from different genes. (c) Causal SNPs are from 5 different genes (d) All causal SNPs are from the same gene. (Left) Pearson's squared correlation coefficient, (Middle) Number of causal genes hit, (Right) Precision calculated for causal SNPs hit. Black bars indicate the 95% confidence intervals.

its regression performance is still comparable. Note that, this is the setting where methods with graph connectivity assumption should perform well (casual SNPs are close). However, we argue that all associated SNPs are rarely that close for complex traits.

Next, we check the number of causal genes hit (GenesHit) for all methods. In all settings, GenesHit and  $R^2$  are correlated (i.e., the higher the number of genes hit, the higher the  $R^2$ ). Yet, there is no evident correlation between Precision and  $R^2$ . For instance, Lasso generally have low Precision, yet perform well in regression. We argue that high number of hit genes indicates high regression performance because then the selected SNPs are unlikely to be correlated as they fall into different genes. Such SNPs are likely to contain complementary information and can explain the phenotype better. This constitutes the core idea of SPADIS.

#### H. Phenotype Prediction Performance

First, we compare the regression performances of SConES(S), SConES(R) and SPADIS using the Pearson's squared correlation coefficient  $R^2$  under *ES2* and *PSS1*. Here, we report results wherein all approaches select 500 SNPs (see Fig. 4). The results for  $k = 100$ , 250, and 1000 are provided in Supplementary Figures 3, 4 and 5 respectively.

Out of 68 tests that is performed for  $k = 500$  over 17 phenotypes using 4 different networks as input, SPADIS outperforms SConES(S) in 46 tests and SConES(R) in 47 tests. The improvement in  $R^2$  is up to 0.15 in a single

phenotype and 0.03 on average. Overall, this corresponds to an improvement in 12 out of 17 phenotypes, when they are averaged over all networks. We test whether the differences in  $R^2$  are statistically significant (FDR adjusted p-value  $\leq 0.05$ ) using the method described in Hittner *et al.* (2003). The multiple hypothesis correction is conducted as in Yekutieli and Benjamini (1999). Three results of SPADIS are found to be significantly better than SConES, whereas none of the results of SConES is found to be significantly better than SPADIS. The same comparison ( $k = 500$ ) under *ES1* instead of *ES2*, can be found in Supplementary Figure 6.

The improvement of SPADIS over SConES in regression performance for a varying number of selected SNPs ( $k = 100$ , 250, 500, 1000) is summarized in Fig. 3. We observe that performance of both methods increase as the set size grows. Therefore, for a fair comparison, we believe that it is important to compare the methods when they select the same number of SNPs. For all  $k$  values tested, SPADIS provides a consistent improvement in regression performance over SConES on average. In addition, the improvement of SPADIS is particularly prevalent when the number of selected SNPs is smaller. When  $k$  is small, the additional information leveraged by SPADIS becomes more evident because there are more room for improvement in the regression performance. We argue that this property of SPADIS may provide an advantage in complex phenotypes with large number of causal SNPs.

A more natural setting for SConES and other methods is

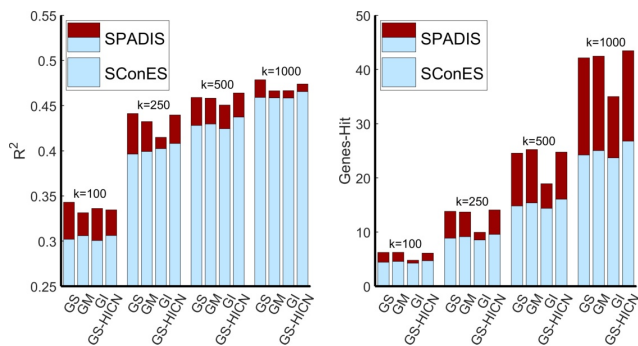

Fig. 3: Figure shows the improvement of SPADIS over SConES in terms of Pearson's squared correlation coefficient (left) and number of distinct candidate genes-hit (right) for different number of SNPs selected,  $k$ . All values shown are averaged over 17 phenotypes. Blue bar indicates the maximum of SConES(S) and SConES(R) for the corresponding network and  $k$  value. The red bar indicates the amount of improvement of SPADIS over SConES.

to let each method decide the number of SNPs based on their parameter search. We perform a second set of experiments (PSS2) in which we allow methods to pick the SNP set size as long as the set sizes are bounded from above by 1% of all SNPs, which is 1733. We let SPADIS select the maximum number of SNPs permitted i.e. 1733. In this setting, we compare SPADIS with SConES(S), SConES(R), Univariate, Lasso(S) and Lasso(R) on all phenotypes.

In PSS2, SPADIS is the best performing method on 8 out of 17 phenotypes on GS network (Fig. 5). Similarly, SPADIS performs best in 9 phenotypes on GM and GS-HICN networks and 8 on the GI network (see Supplementary Figures 7-9). When regression performances ( $R^2$ ) are averaged over all phenotypes for each method, SPADIS outperforms all other methods, on every network (see Fig. 6). The next two best performing methods are SConES(R) and Lasso(R), respectively. Unsurprisingly, the methods that are optimized according to  $R^2$  are better in regression than their stability optimized versions on average. Next, we check whether the differences between SPADIS and other methods are statistically significant as it was done for PSS1. Out of 68 experiments of SPADIS (17 phenotypes  $\times$  4 networks) SPADIS is found to be significantly better than (i) SConES(R) in 2 experiments, (ii) Lasso(R) in 6 experiments, (iii) SConES(S) in 14 experiments, (iv) Univariate in 17 experiments, and finally, (v) Lasso(S) in 28 experiments. In none of the experiments, SPADIS is found to be significantly worse than its counterparts. See Supplementary Figures 10-12 for the corresponding results.

### I. Diverse Selection of SNPs

The goal of SPADIS is select a diverse set of SNPs over the SNP-SNP network. We hypothesize that SNPs selected with SPADIS correspond to more diverse biological processes and that the prediction performance increase is due to this effect.

Here, we investigate whether this hypothesis is supported by empirical values.

First, we compare the average number of candidate genes hit by each method (out of 165 candidate genes related with flowering time). A gene is considered *hit* if the method selects a SNP *near* the gene ( $\leq 20$  kbp). Number of distinct candidate genes *hit* by SPADIS lies in the interval [18.9, 25.2], which is an increase between 31% and 66% compared to the maximum amount SConES(S) or SConES(R) could detect over different networks (see TABLE I). It is an indication that SPADIS realizes its goal which is to cover the genome more even a limited number of SNPs selected.

In order to test our intuition that SPADIS discovers SNPs that are related to diverse processes, we check how many distinct GO biological processes are hit by the SNPs discovered in each method. As shown in TABLE I, SNPs discovered by SPADIS covers 490 GO-terms on average (by hitting genes annotated with those GO terms). This is an increase of 21% and 33% over the best SConES(S) and SConES(R) results on different networks, which again supports our claim.

Finally, we compare the methods with respect to the ratio of the number of selected SNPs that are near a candidate gene and the total number of selected SNPs, as done in Azencott *et al.* 2013 for the sake of completeness. This metric measures the *precision* of the selected SNPs, hence we denote it as such. As shown in TABLE I, SPADIS consistently underperforms in this metric. Nevertheless, we argue that it is not a good measure of how well the methods perform. *Precision* considers all SNPs near a candidate gene as true positives. That is why the methods that favor connectivity of SNPs on the network perform well with respect to this metric. Consider the following extreme case: a method that selects solely a set of SNPs near a single candidate gene can easily achieve *precision* value of 1.0. Hence, *precision* indirectly rewards the selection of SNPs that fall into a smaller number of genes. On the other hand, the diversification of the SNPs in terms of genes and biological processes help explain the phenotype better. This metric is in clear contrast with the number of genes hit, hence the regression performance - see Table I.

### J. Contribution of the Hi-C Data

We evaluate the information leveraged by using the Hi-C data by comparing, (i) when using other networks (GS, GM, and GI) versus (ii) when using GS-HICN, in all 17 phenotypes for  $k = 500$ . As shown in Fig. 7, Hi-C data provides slight but consistent improvements in regression performance over all networks on average: 0.7% higher than GS and GM, 1.3% higher than GI, on average. Also as it can be seen in TABLE I, Hi-C data using SPADIS covers the largest number of biological processes hit: 2.2% more than GS, 4.5% more than GM and 10.6% higher than GI on average. Moreover, the improvement is consistent over phenotypes compared to GM and GI: in 15 out of 17 phenotypes, GS-HICN covers more biological processes compared to GM, and this number is 16 when compared to GI, and 10 when compared to GS. Note that,  $GS \subset GS-HICN$  but  $GM, GI \not\subset GS-HICN$ . We argue that

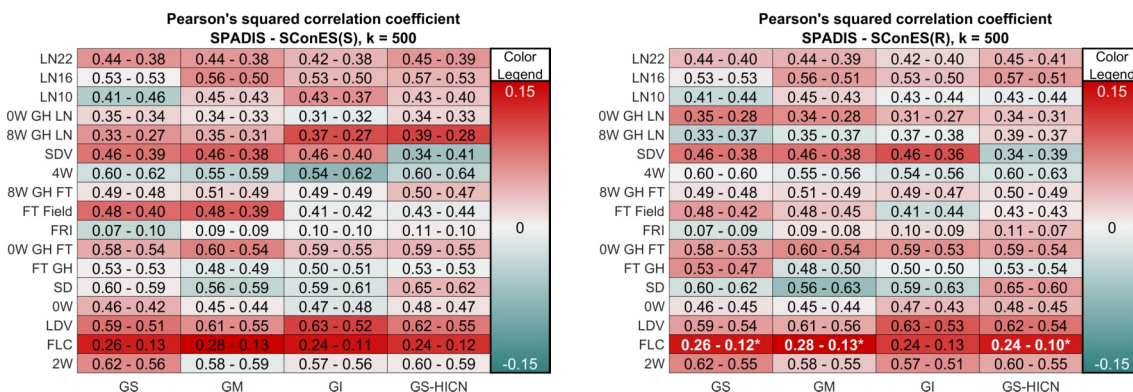

Fig. 4: The regression performances of SPADIS, SConES(R) and SConES(S) on AT data for  $k = 500$ . The rows denote phenotypes and the columns denote networks. The numbers in each cell show Pearson's squared correlation coefficients attained by SPADIS and SConES respectively. The background color encodes the difference in correlation coefficients between SPADIS and SConES. Red indicates SPADIS performs better than SConES while blue indicates otherwise. Differences that are found to be statistically significant are shown in bold and white and marked with star (\*).

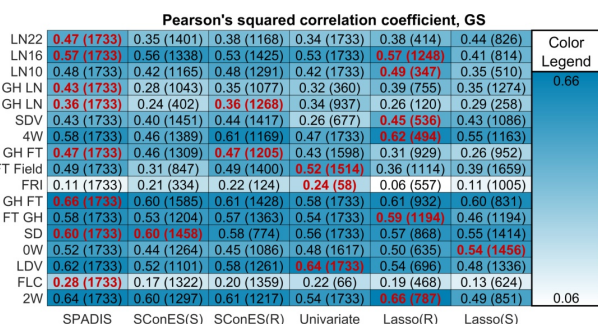

Fig. 5: The regression performances of SPADIS, SConES(S), SConES(R), Univariate, Lasso(R) and Lasso(S) for PSS2 for GS network and all phenotypes. Rows are phenotypes and the columns are compared methods. The numbers in each cell show Pearson's squared correlation coefficients for the corresponding phenotype and method. The average cardinality of the selected SNP sets (over 10 evaluation folds) are given in parentheses. For each phenotype, the best performing method(s) are shown with bold and red font. While determining the best performing method(s), differences smaller than two significant digits are disregarded.

similar results of GS-HICN and GS is because GS is a subset of GS-HICN. We observe similar trends when  $k = 100$ ,  $k = 250$  and  $k = 1000$  as well. See corresponding results in Supplementary Figures 13-15 and Supplementary Tables 1-3.

#### IV. DISCUSSION

SPADIS seeks for a subset of SNPs on a network derived from biological knowledge, such that the selected SNP set is associated with the phenotype. Even though there are methods for tackling the same problem with a similar formulation, they rest on the assumption that causal SNPs tend to be connected on the network. Thus, they incorporate constraints that favor the connectivity of selected SNPs. However, we argue that

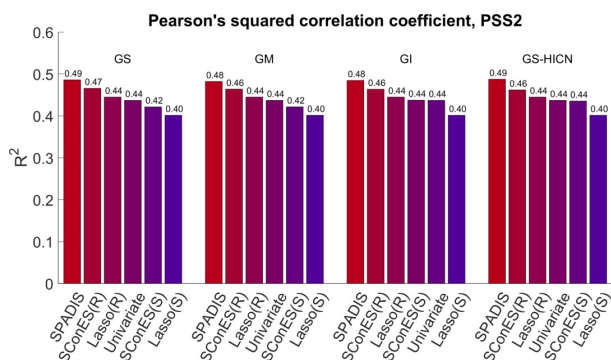

Fig. 6: Average regression performances of SPADIS, SConES(S), SConES(R), Univariate, Lasso(R) and Lasso(S) over 17 AT phenotypes, using PSS2. X-axis shows the compared methods and Y-axis shows the Pearson's squared correlation coefficient ( $R^2$ ). For each network, the methods are ordered in descending order of  $R^2$ .

SNPs affecting diverse biological processes would be complementary and explain the phenotype better. The SNPs that are nearby might not provide additional predictive power as they can be in haplotype blocks and bring redundant information. To derive meaningful insights, a method that can highlight different parts of the networks, thus, different potentially hit biological processes, will be useful. To address this issue, we propose a new formulation: As opposed to enforcing graph connectivity over the set of selected features, we set out to discover SNPs that are far apart in terms of their location on the genome, which translate into diversity in function. To the best of our knowledge, none of the current approaches operate with this principle. Our results indicate that selecting SNPs remotely located on the network indeed hit genes that are related to a larger number of distinct biological processes. This property can help in gaining more biological insights into the genetic basis of the complex traits and diseases.



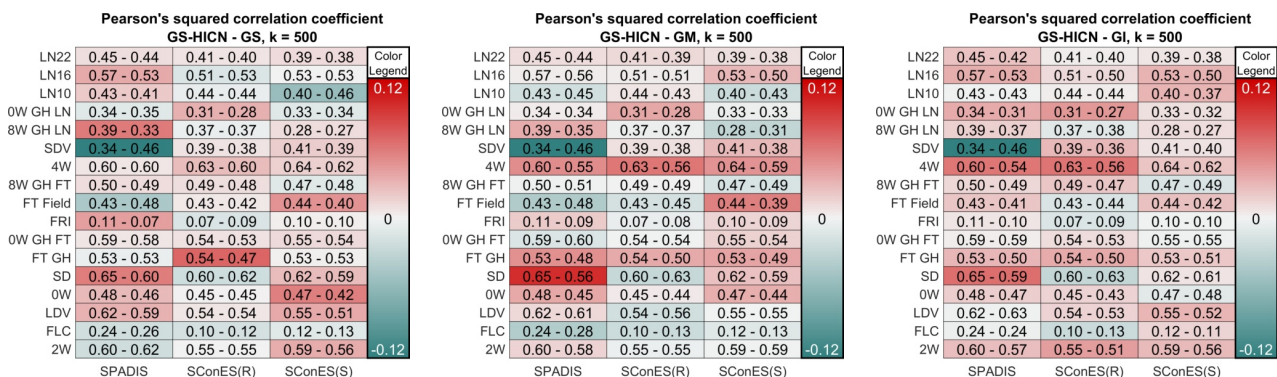

Fig. 7: The regression performances of the methods for GS, GM, GI, GS-HICN networks on AT data for  $k = 500$ . The rows denote phenotypes and columns denote methods. The figure focuses on the Pearson's squared correlation coefficients differences between GS-HICN and other networks. Left : GS-HICN vs GS , Middle : GS-HICN vs GM, Right : GS-HICN vs GI. The background is colored in accordance with their differences. Red indicates GS-HICN performs better than the other network while blue indicates vice versa.

TABLE I: Table shows statistics about the genes and biological processes hit by the selected SNPs for each method when the number of selected SNPs is 500. The values are averages over all 17 phenotypes. Genes-Hit is the number of distinct candidate flowering time genes identified. GO-Hit is the number of distinct biological processes hit by the selected SNPs. A process is considered hit if the method chooses a SNP near a gene which is annotated with that biological term. Precision is the ratio of the number of selected SNPs near candidate genes and the total number of selected SNPs.  $R^2$  is the Pearson's squared correlation coefficient.

| Network | Method    | Genes-Hit | GO-Hit | Precision(%) | $R^2$ |
|---------|-----------|-----------|--------|--------------|-------|
| GS      | SPADIS    | 24.6      | 500    | 6.5%         | 0.459 |
| GS      | SConES(S) | 13.3      | 347    | 9.0%         | 0.426 |
| GS      | SConES(R) | 14.8      | 375    | 8.7%         | 0.428 |
| GM      | SPADIS    | 25.2      | 489    | 6.4%         | 0.458 |
| GM      | SConES(S) | 15.3      | 383    | 8.6%         | 0.425 |
| GM      | SConES(R) | 15.4      | 385    | 8.6%         | 0.430 |
| GI      | SPADIS    | 18.9      | 462    | 5.5%         | 0.451 |
| GI      | SConES(S) | 12.7      | 373    | 7.0%         | 0.424 |
| GI      | SConES(R) | 14.4      | 381    | 8.0%         | 0.422 |
| GS-HICN | SPADIS    | 24.8      | 511    | 6.6%         | 0.464 |
| GS-HICN | SConES(S) | 16.1      | 391    | 8.7%         | 0.437 |
| GS-HICN | SConES(R) | 15.6      | 387    | 8.6%         | 0.434 |

The technical contribution of this paper involves formulating this principle through a submodular function. We empirically show that SPADIS can recover SNPs known to be associated with the phenotype and the optimization is efficient. Another alternative would be to formulate an optimization function that directly rewards the number of distinct process hits. However, given the incomplete knowledge of the annotations, this could lead to literature bias. Therefore, we refrain from incorporating such a term directly in the model, instead, we let the diversity on the 2D and 3D distances lead the selection.

To score each SNPs relevance to the phenotype, we use sequence kernel association test (SKAT) based on its success and for drawing a fair comparison to the existing literature.

There are other alternatives such as Pearson's correlation coefficient, or maximal information coefficient Reshef *et al.* (2011), which can be used as long as the computed scores are non-negative or are transformed to a non-negative range.

For the first time, we investigate the utility of Hi-C data for selecting a SNP set. Our results show that Hi-C data provides consistently slight improvements in regression performance. We think it is a promising source of information for SNP association. We currently limit the use of data to intra-chromosomal contacts due to much better higher resolution compared to inter-chromosomal contact maps (2 kbp vs. 20 kbp). We also discard contacts that fall outside of the significance range. These choices are likely to over-constrain the method, and further research is needed to fully utilize such information, which we leave as future work.

SPADIS can be used for discovering associated SNP sets for complex genetic disorders. For instance in autism, the former research efforts have mostly focused on identifying risk genes through whole exome sequencing studies (De Rubeis *et al.*, 2014; Iossifov *et al.*, 2014). However, close to 90% of the point mutations fall outside of the coding regions (Hindorff *et al.*, 2009). Discovering a set of non-coding risk mutations will certainly help to uncover the genetic architecture. Very recently, a large-scale effort to collect GWAS data of autism families along with clinical information of patients is reported (Yuen *et al.*, 2017). In this article, we introduce SPADIS and benchmark its performance on AT genotype and phenotypes. In future work, we plan to apply SPADIS on autism, which should help explain the heterogeneity in wide spectrum of phenotypes.

## V. AVAILABILITY

The code of SPADIS is available under the GNU General Public License 3.0 at <http://ciceklab.cs.bilkent.edu.tr/spadis>.

## VI. FUNDING

This work was supported by the TUBITAK Career Grant [#116E148 to AEC].

1) *Conflict of interest statement.*: None declared.

#### ACKNOWLEDGEMENTS

We thank Chlo-Agathe Azencott and Dominik Grimm for their help on running SConES, Mehmet Koyuturk and Utku Norman for their feedback on SPADIS.

#### REFERENCES

- Atwell, S. *et al.* (2010). Genome-wide association study of 107 phenotypes in arabidopsis thaliana inbred lines. *Nature*, **465**(7298), 627–631.
- Ay, F. *et al.* (2014). Statistical confidence estimation for hi-c data reveals regulatory chromatin contacts. *Genome research*, **24**(6), 999–1011.
- Ayati, M. and Koyutürk, M. (2016). Pocos: Population covering locus sets for risk assessment in complex diseases. *PLoS computational biology*, **12**(11), e1005195.
- Azencott, C.-A. *et al.* (2013). Efficient network-guided multi-locus association mapping with graph cuts. *Bioinformatics*, **29**(13), i171–i179.
- Berardini, T. Z. *et al.* (2004). Functional annotation of the arabidopsis genome using controlled vocabularies. *Plant Physiology*, **135**(2), 745–755.
- Bickmore, W. A. (2013). The spatial organization of the human genome. *Annual review of genomics and human genetics*, **14**, 67–84.
- Cho, S. *et al.* (2010). Joint identification of multiple genetic variants via elastic-net variable selection in a genome-wide association analysis. *Annals of human genetics*, **74**(5), 416–428.
- Christensen, K. and Murray, J. C. (2007). What genome-wide association studies can do for medicine. *New England Journal of Medicine*, **356**(11), 1094–1097. PMID: 17360987.
- Cordell, H. J. (2009). Detecting gene–gene interactions that underlie human diseases. *Nature Reviews Genetics*, **10**(6), 392–404.
- de Leeuw, C. A. *et al.* (2015). Magma: generalized gene-set analysis of gwas data. *PLoS computational biology*, **11**(4), e1004219.
- De Rubeis, S. *et al.* (2014). Synaptic, transcriptional and chromatin genes disrupted in autism. *Nature*, **515**(7526), 209–215.
- Ding, X. *et al.* (2015). Searching high-order snp combinations for complex diseases based on energy distribution difference. *IEEE/ACM Transactions on Computational Biology and Bioinformatics (TCBB)*, **12**(3), 695–704.
- Evans, D. M. *et al.* (2006). Two-stage two-locus models in genome-wide association. *PLoS Genetics*, **2**(9), e157.
- Fang, G. *et al.* (2012). High-order snp combinations associated with complex diseases: efficient discovery, statistical power and functional interactions. *PLoS one*, **7**(4), e33531.
- Fincham, J. R. S. (1968). Genetic complementation. *Science Progress (1933-)*, pages 165–177.
- Geschwind, D. H. (2008). Autism: many genes, common pathways? *Cell*, **135**(3), 391–395.
- Goldstein, D. B. *et al.* (2009). Common genetic variation and human traits. *New England Journal of Medicine*, **360**(17), 1696.
- Guo, X. *et al.* (2014). Cloud computing for detecting high-order genome-wide epistatic interaction via dynamic clustering. *BMC bioinformatics*, **15**(1), 102.
- Herold, C. *et al.* (2009). Intersnp: genome-wide interaction analysis guided by a priori information. *Bioinformatics*, **25**(24), 3275–3281.
- Hindorf, L. A. *et al.* (2009). Potential etiologic and functional implications of genome-wide association loci for human diseases and traits. *Proceedings of the National Academy of Sciences*, **106**(23), 9362–9367.
- Hittner, J. B. *et al.* (2003). A monte carlo evaluation of tests for comparing dependent correlations. *The Journal of general psychology*, **130**(2), 149–168.
- Hua, X. *et al.* (2010). Testing multiple gene interactions by the ordered combinatorial partitioning method in case–control studies. *Bioinformatics*, **26**(15), 1871–1878.
- Huang, J. *et al.* (2011). Learning with structured sparsity. *Journal of Machine Learning Research*, **12**(Nov), 3371–3412.
- Iossifov, I. *et al.* (2014). The contribution of de novo coding mutations to autism spectrum disorder. *Nature*, **515**(7526), 216–221.
- Jacob, L. *et al.* (2009). Group lasso with overlap and graph lasso. In *Proceedings of the 26th annual international conference on machine learning*, pages 433–440. ACM.
- Jäger, R. *et al.* (2015). Capture hi-c identifies the chromatin interactome of colorectal cancer risk loci. *Nature communications*, **6**.
- Jiang, R. *et al.* (2009). A random forest approach to the detection of epistatic interactions in case-control studies. *BMC bioinformatics*, **10**(1), S65.
- Kraft, P. and Hunter, D. J. (2009). Genetic risk prediction are we there yet? *New England Journal of Medicine*, **360**(17), 1701–1703.
- Krause, A. and Guestrin, C. (2005). Near-optimal nonmyopic value of information in graphical models. In *Proceedings of the Twenty-First Conference on Uncertainty in Artificial Intelligence, UAI'05*, pages 324–331, Arlington, Virginia, United States. AUAI Press.
- Lehár, J. *et al.* (2008). High-order combination effects and biological robustness. *Molecular Systems Biology*, **4**(1), 215.
- Liu, J. *et al.* (2009). Slep: Sparse learning with efficient projections. *Arizona State University*, **6**(491), 7.
- Lou, X.-Y. *et al.* (2007). A generalized combinatorial approach for detecting gene-by-gene and gene-by-environment interactions with application to nicotine dependence. *The American Journal of Human Genetics*, **80**(6), 1125–1137.
- Manolio, T. A. *et al.* (2009). Finding the missing heritability of complex diseases. *Nature*, **461**(7265), 747–753.
- Martin, P. *et al.* (2015). Capture hi-c reveals novel candidate genes and complex long-range interactions with related autoimmune risk loci. *Nature communications*, **6**, 10069.

- Miele, A. and Dekker, J. (2008). Long-range chromosomal interactions and gene regulation. *Molecular biosystems*, **4**(11), 1046–1057.
- Moore, J. H. *et al.* (2010). Bioinformatics challenges for genome-wide association studies. *Bioinformatics*, **26**(4), 445–455.
- Nelson, M. *et al.* (2001). A combinatorial partitioning method to identify multilocus genotypic partitions that predict quantitative trait variation. *Genome research*, **11**(3), 458–470.
- Nemhauser, G. L. *et al.* (1978). An analysis of approximations for maximizing submodular set functions. *Mathematical Programming*, **14**(1), 265–294.
- Phillips, P. C. (2008). Epistasis: the essential role of gene interactions in the structure and evolution of genetic systems. *Nature Reviews Genetics*, **9**(11), 855–867.
- Price, A. L. *et al.* (2006). Principal components analysis corrects for stratification in genome-wide association studies. *Nature genetics*, **38**(8), 904–909.
- Rakitsch, B. *et al.* (2012). A lasso multi-marker mixed model for association mapping with population structure correction. *Bioinformatics*, **29**(2), 206–214.
- Reshef, D. N. *et al.* (2011). Detecting novel associations in large data sets. *Science*, **334**(6062), 1518–1524.
- Ritchie, M. D. *et al.* (2001). Multifactor-dimensionality reduction reveals high-order interactions among estrogen-metabolism genes in sporadic breast cancer. *The American Journal of Human Genetics*, **69**(1), 138–147.
- Segura, V. *et al.* (2012). An efficient multi-locus mixed-model approach for genome-wide association studies in structured populations. *Nature genetics*, **44**(7), 825–830.
- Shi, W. *et al.* (2008). Lasso-patternsearch algorithm with application to ophthalmology and genomic data. *Statistics and its Interface*, **1**(1), 137.
- Storey, J. D. *et al.* (2005). Multiple locus linkage analysis of genomewide expression in yeast. *PLoS biology*, **3**(8), e267.
- Sugiyama, M. *et al.* (2014). Multi-task feature selection on multiple networks via maximum flows. In *Proceedings of the 2014 SIAM International Conference on Data Mining*, pages 199–207. SIAM.
- Tang, W. *et al.* (2009). Epistatic module detection for case-control studies: a bayesian model with a gibbs sampling strategy. *PLoS genetics*, **5**(5), e1000464.
- Tibshirani, R. (1996). Regression shrinkage and selection via the lasso. *Journal of the Royal Statistical Society. Series B (Methodological)*, pages 267–288.
- Tuo, S. *et al.* (2017). Niche harmony search algorithm for detecting complex disease associated high-order snp combinations. *Scientific Reports*, **7**(1), 11529.
- van Berkum, N. L. *et al.* (2010). Hi-c: a method to study the three-dimensional architecture of genomes. *J Vis Exp*, (39).
- Varadan, V. and Anastassiou, D. (2006). Inference of disease-related molecular logic from systems-based microarray analysis. *PLoS computational biology*, **2**(6), e68.
- Varadan, V. *et al.* (2006). Computational inference of the molecular logic for synaptic connectivity in *c. elegans*. *Bioinformatics*, **22**(14), e497–e506.
- Visscher, P. M. *et al.* (2017). 10 years of gwas discovery: biology, function, and translation. *The American Journal of Human Genetics*, **101**(1), 5–22.
- Wan, X. *et al.* (2010). Boost: A fast approach to detecting gene-gene interactions in genome-wide case-control studies. *The American Journal of Human Genetics*, **87**(3), 325–340.
- Wang, C. *et al.* (2015). Genome-wide analysis of local chromatin packing in arabidopsis thaliana. *Genome research*, **25**(2), 246–256.
- Wang, D. *et al.* (2011a). Identifying qtls and epistasis in structured plant populations using adaptive mixed lasso. *Journal of agricultural, biological, and environmental statistics*, **16**(2), 170–184.
- Wang, L. *et al.* (2011b). An efficient hierarchical generalized linear mixed model for pathway analysis of genome-wide association studies. *Bioinformatics*, **27**(5), 686–692.
- Wang, X. *et al.* (2010a). The meaning of interaction. *Human heredity*, **70**(4), 269–277.
- Wang, Z. *et al.* (2010b). A general model for multilocus epistatic interactions in case-control studies. *PLoS One*, **5**(8), e11384.
- Wei, W.-H. *et al.* (2014). Detecting epistasis in human complex traits. *Nature Reviews Genetics*, **15**(11), 722–733.
- Wiltshire, S. *et al.* (2006). Epistasis between type 2 diabetes susceptibility loci on chromosomes 1q21-25 and 10q23-26 in northern europeans. *Annals of human genetics*, **70**(6), 726–737.
- Wu, M. C. *et al.* (2011). Rare-variant association testing for sequencing data with the sequence kernel association test. *The American Journal of Human Genetics*, **89**(1), 82–93.
- Wu, T. T. *et al.* (2009). Genome-wide association analysis by lasso penalized logistic regression. *Bioinformatics*, **25**(6), 714–721.
- Yekutieli, D. and Benjamini, Y. (1999). Resampling-based false discovery rate controlling multiple test procedures for correlated test statistics. *Journal of Statistical Planning and Inference*, **82**(1), 171–196.
- Yosef, N. *et al.* (2007). A supervised approach for identifying discriminating genotype patterns and its application to breast cancer data. *Bioinformatics*, **23**(2), e91–e98.
- Yuen, R. K. *et al.* (2017). Whole genome sequencing resource identifies 18 new candidate genes for autism spectrum disorder. *Nature Neuroscience*, **20**(4), 602–611.
- Zhang, W. *et al.* (2010). A bayesian partition method for detecting pleiotropic and epistatic eqtl modules. *PLoS computational biology*, **6**(1), e1000642.
- Zhang, Y. and Liu, J. S. (2007). Bayesian inference of epistatic interactions in case-control studies. *Nature genetics*, **39**(9), 1167–1173.
